# Supplementary material for: Routine culture and study of adult human brain cells from neurosurgical specimens
Source: Springer Nature journal article supplement (doi:10.1038/s41596-021-00637-8), 2022-01-12
Supplement: MOESM1 [file 41596_2021_637_MOESM1_ESM24.pdf]

**Supplementary information**

---

**Routine culture and study of adult human  
brain cells from neurosurgical specimens**

---

In the format provided by the  
authors and unedited

## Supplementary Figures

**Supplementary Figure 1.** Photomicrographs of representative neuronal cultures. A-B illustrate a culture that is void of tumour cell contamination and C-D show how a culture appears when there is tumour cell contamination. Scale bars: A and C = 400  $\mu\text{m}$ , B and D = 200  $\mu\text{m}$ . Reproduced from Park et al. 2020, Brain Communications through creative commons license 4.0.

### Neuronal culture devoid of tumour cells

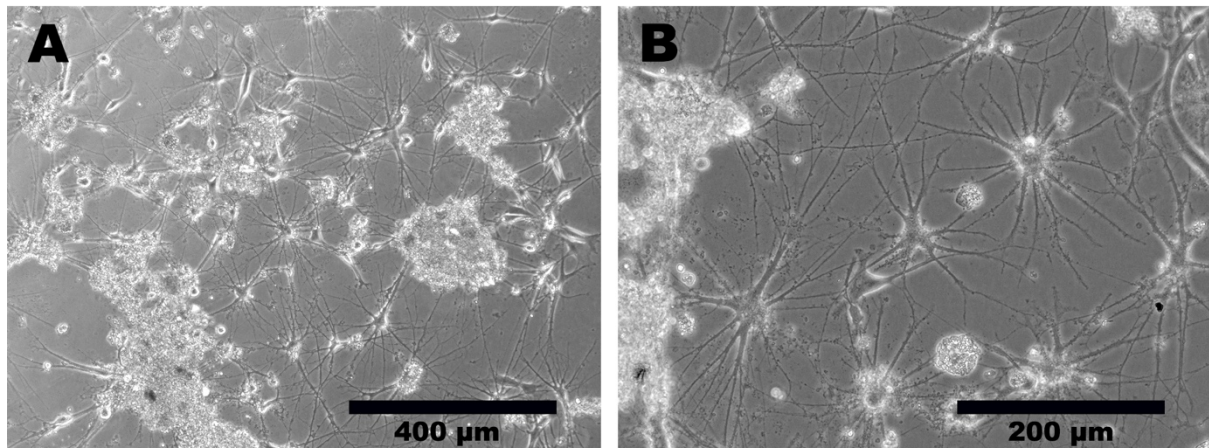

### Neuronal culture with tumour contamination

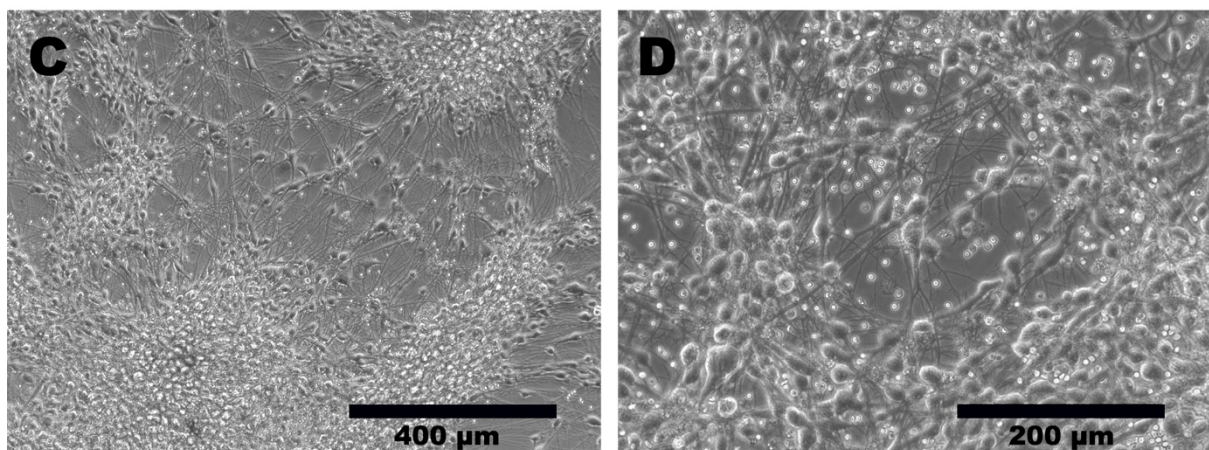

**Supplementary Figure 2.** Photomicrographs illustrating a high purity microglia culture vs a low purity culture contaminated by pericytes (microglia = Red arrow, pericytes = Black arrows). Scale bar = 100  $\mu\text{m}$ .

### **Pericyte contamination of microglia cultures**

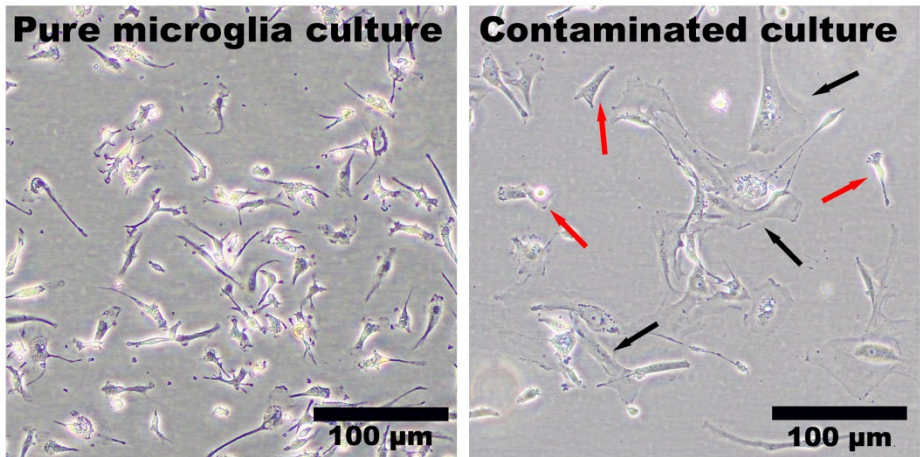

## Supplementary Tables

Supplementary Table 1: Percentage of GFAP<sup>+</sup> astrocytes in mixed glial and neuronal cultures.

| Case number   | Mixed glial cultures (%) | Neuronal cultures (%) |
|---------------|--------------------------|-----------------------|
| 1             | 1.2                      | 9.1                   |
| 2             | 1.1                      | 14.3                  |
| 3             | 1.1                      | 9.1                   |
| 4             |                          | 9.3                   |
| 5             |                          | 12.9                  |
| Mean $\pm$ SD | n=3, 1.13 $\pm$ 0.05     | n=5, 10.9 $\pm$ 2.5   |

Supplementary Table 2: Percentage of PU1<sup>+</sup> microglia in mixed glial cultures (n=5)

| Case number         | Percentage of microglia (PU1 <sup>+</sup> ) |
|---------------------|---------------------------------------------|
| 1                   | 9.2                                         |
| 2                   | 9.4                                         |
| 3                   | 10.7                                        |
| 4                   | 13.9                                        |
| 5                   | 15.2                                        |
| Mean $\pm$ SD (n=5) | 11.7 $\pm$ 2.7                              |

Supplementary Table 3: Percentage of PU1<sup>+</sup> microglia in enriched microglial cultures (n=14)

| Underlying pathology                    | Case number | Surgery             | Percentage of microglia (PU1 <sup>+</sup> ) |
|-----------------------------------------|-------------|---------------------|---------------------------------------------|
| Intractable Epilepsy (n=5)              | 1           | Temporal lobectomy  | 91.8                                        |
|                                         | 2           | Temporal lobectomy  | 88.0                                        |
|                                         | 3           | Temporal lobectomy  | 84.0                                        |
|                                         | 4           | Temporal lobectomy  | 82.6                                        |
|                                         | 5           | Temporal lobectomy  | 86.6                                        |
|                                         |             |                     | Mean $\pm$ SD (n=5)                         |
| Brain tumours (n=7)                     | 1           | Tumour debulking    | 98.8                                        |
|                                         | 2           | Tumour debulking    | 76.2                                        |
|                                         | 3           | Tumour debulking    | 81.5                                        |
|                                         | 4           | Tumour debulking    | 84.4                                        |
|                                         | 5           | Tumour debulking    | 83.3                                        |
|                                         | 6           | Tumour debulking    | 94.8                                        |
|                                         | 7           | Tumour debulking    | 85.7                                        |
|                                         |             | Mean $\pm$ SD (n=7) | 86.4 $\pm$ 7.8                              |
| Paediatric cortical malformations (n=2) | 1           | Cortical resection  | 74.4                                        |
|                                         | 2           | Cortical resection  | 52.5                                        |
|                                         |             |                     | Mean $\pm$ SD (n=2)                         |

### **Supplementary information – NPC differentiation**

After forming NPC single cell suspension at following steps in 24-C, undertake the following steps to achieve neuronal and astrocytic differentiation of the NPCs.

First, prepare the differentiation media. There are several options, based on your desired outcome.

All neuronal differentiation media contains the following (final concentration is stated below):

1. 1 % (v/v) GlutaMAX<sup>®</sup> (Gibco; cat. no. 35050-038).
2. 1 % (v/v) Penicillin–streptomycin (Gibco; cat no. 15140).
3. 40 ng/mL Nerve growth factor (NGF, Peprotech, cat. no. 450-01).
4. 40 ng/mL Neurotrophic factor-3 (NT-3, Peprotech, cat. no. 450-03).
5. 40 ng/mL Brain derived neurotrophic factor (BDNF, Peprotech, cat. no. 450-02).

Differentiation media – Option 1: DMEM:F12 + 1 % FBS medium

Dulbecco's Modified Eagle Medium/Nutrient Mix F-12 (DMEM/F12; Invitrogen) supplemented with 1 % (v/v) fetal bovine serum (FBS, Invitrogen).

- (a) Widely used to differentiate NSCs/NPCs into neurons and astrocytes.
- (b) Results in physiologically active neurons and astrocytes.
- (c) However, also supports the growth of pericytes, and in long-term cultures, they will dominate the culture.

Differentiation media – Option 2: DMEM:F12 + B27 + dibutyryl cAMP

Dulbecco's Modified Eagle Medium/Nutrient Mix F-12 (DMEM/F12; Invitrogen) supplemented with 2 % (v/v) B27 with vitamin A (Invitrogen, cat no. 17504-044) and 1  $\mu$ M dibutyryl cAMP.

- (a) The absence of serum limits the growth and proliferation of the pericytes.
- (b) Addition of a cAMP analog enhances neuronal differentiation that results in electrically active neurons and astrocytes.
- (c) However, there is a slight compromise in cell viability, when compared to the DMEM:F12 1% FBS medium.

Procedure:

- 1) Collect the single cell suspension obtained from Step 24-C.
- 2) Dilute the cells using one of the above media to a cell density of 10,000 cells/mL.
- 3) Plate onto Matrigel-coated tissue culture plates or coverslips (see Reagent Setup – Matrigel) at their designated volumes. (e.g. 96 well plate = 100  $\mu$ L).
- 4) Half change media with your designated differentiation media every 2-3 days.

It usually takes 2-3 weeks for the NPCs to differentiate into electrophysiologically-active neurons and astrocytes.
