# Supplementary material for: Routine culture and study of adult human brain cells from neurosurgical specimens
Source: Springer Nature journal article supplement (doi:10.1038/s41596-021-00637-8), 2022-01-12
Supplement: MOESM2 [file 41596_2021_637_MOESM2_ESM25.xlsx]

## Sheet: Supplementary Table 1
Astrocyte Percentage
Case number	Mixed glial (%)	Underlying Path		Neuronal Cultures (%)	Underlying Path
1	1.19	Epilespy		9.1	GBM (normal cortex)
2	1.09	Epilespy		14.3	Cortical dysplasia
3	1.12	Epilespy		9.1	Epilespy
4				9.3	Epilespy
5				12.9	Epilespy
Mean	1.13333			10.94
SD	0.051316			2.47952

## Sheet: Mixed Glial Astro Raw Data
Sample	E179				T189					E190
	Total Cell Count	% GFAP	% Astro			Total Cell Count	% GFAP	% Astro			Total Cell Count	% GFAP	% Astro
1	348	5	1.43678		1	259	6	2.3166		1	194	3	1.54639
2	331	3	0.906344		2	241	2	0.829876		2	276	2	0.724638
3	341	5	1.46628		3	273	2	0.732601		3	261	1	0.383142
4	324	5	1.54321		4	323	1	0.309598		4	262	2	0.763359
5	341	2	0.58651		5	218	5	2.29358		5	198	1	0.505051
6	295	4	1.35593		6	330	1	0.30303		6	294	4	1.36054
7	316	7	2.21519		7	292	3	1.0274		7	222	3	1.35135
8	235	0	0		8	237	1	0.421941		8	261	2	0.766284
					9	292	4	1.36986		9	189	5	2.6455
		Avg	1.18878		10	277	3	1.08303
					11	302	4	1.3245				Avg	1.11625
							Avg	1.092

## Sheet: Neuronal Culture Astro Raw Data
Sample	T180	SS56	E215	E212	E213
	GFAP+ cell %	GFAP+ cell %	GFAP+ cell %	GFAP+ cell %	GFAP+ cell %
1	16.682	7.173	4.5045	6.76692	12.5541
2	11.2656	20.3463	7.61905	10.7143	11.4583
3	10.0865	7.3991	0.625	7.27273	12.3989
4	9.54479	11.5473	2.57732	4.16667	15.5673
5	9.03704	9.72222	3.18471	6.45161	8.10056
6	16.3743	11.7096	15.0289	3.01205	13.7681
7	8.6262	9.31373	17.4359	7.75862	9.11458
8	16.0131	7.88804	2.95858	3.7037	11.3402
9	14.5833	20.7254	21.8605	0.952381	10.9635
10	13.4328	4.31267	7.12166	1.63934	13.9942
11	15.8163	11.8182	3.82166	8.55615	8.74636
12	21.5116	20.8723	5.97015	7.18232	12.5813
13	12.4224	15.7343	5.92105	5.625	18.0723
14	11.875	3.10881	26.2673	13.0208	23.8554
15	17.2414	3.26087	10.4	10.4348	15.75
16	8.51064	0	1.92308	6.62983	8.64865
17	12.2951		10.2564	7.91367	9.1623
18	9.16667		16.2088	13.2184	18.2927
19	2.5		16.369	13.6905	20.9169
20	6.08696		16.9265	11.7347	20.3125
21	0.970874		7.0922	11.6022	10.9422
22	6.79612		6.74157	17.6991	15.6364
23	1.9802		3	7.40741	14.2857
24	9.90099		6.73854	8	14.7493
25	3.26087		6.04027	13.2353	14.1066
26	0			5.88235	10.0719
27	5.12821			14.2857	12.336
28	18.9189			7.44681	16.6276
29	0			9.92908	16.4619
30	0			14.9068	11.9816
31	10.7692			19.7044	7.29167
32	10			11.9617	9.09091
33	1.72414			8.84956	14.6154
34	0			12.3711	5.74018
35	6.12245			11.8919	4.87013
Avg	9.10411	10.3082	9.06371	9.30337	12.983
SD	6.00884	6.45645	6.78578	4.31132	4.29061

## Sheet: Supplementary Table 2
Percentage of PU1 cells in mixed glial cultures
	% PU1	Path
1	9.17	Epilepsy
2	9.44	Epilepsy
3	10.65	Epilepsy
4	13.87	Epilepsy
5	15.2	Epilepsy
Mean	11.666
SD	2.71864

## Sheet: Mixed Glial Micro Raw Data
Sample	E180				T187					T188					E190_isolation 1					T190_isolation 2
	Total Cell Count	% PU1	% Micro			Total Cell Count	% PU1	% Micro			Total Cell Count	% PU1	% Micro			Total Cell Count	% PU1	% Micro			Total Cell Count	% PU1	% Micro
1	357	41	11.4846		1	255	51	20		1	254	38	14.9606		1	420	30	7.14286		1	194	21	10.8247
2	408	37	9.06863		2	317	47	14.8265		2	324	33	10.1852		2	507	41	8.08679		2	231	25	10.8225
3	412	49	11.8932		3	236	39	16.5254		3	211	17	8.05687		3	394	23	5.83756		3	229	19	8.29694
4	346	35	10.1156		4	243	33	13.5802		4	222	31	13.964		4	383	43	11.2272		4	261	21	8.04598
5	338	27	7.98817		5	317	46	14.511		5	310	38	12.2581		5	339	32	9.43953		5	262	26	9.92366
6	511	60	11.7417		6	264	39	14.7727		6	283	30	10.6007		6	337	39	11.5727		6	240	25	10.4167
7	425	39	9.17647		7	300	51	17		7	268	43	16.0448		7	305	27	8.85246		7	224	25	11.1607
8	350	48	13.7143		8	300	38	12.6667		8	269	34	12.6394		8	281	24	8.54093		8	294	19	6.46259
					9	314	37	11.7834		9	251	32	12.749		9	374	36	9.62567		9	222	22	9.90991
		Avg	10.6478		10	309	49	15.8576		10	327	36	11.0092		10	389	37	9.51157		10	215	23	10.6977
					11	337	54	16.0237		11	326	48	14.7239		11	334	37	11.0778		11	257	20	7.7821
					11	312	46	14.7436		12	274	40	14.5985							12	189	17	8.99471
										13	259	36	13.8996				Avg	9.1741
							Avg	15.1909		14	241	29	12.0332									Avg	9.44485
										15	318	43	13.522
										16	336	49	14.5833
										17	257	36	14.0078
										18	308	34	11.039
										19	351	52	14.8148
										20	332	44	13.253
										21	298	42	14.094
										22	309	42	13.5922
										23	331	52	15.71
										24	308	43	13.961
										25	320	48	15
										26	294	43	14.6259
										27	297	45	15.1515
										28	301	57	18.9369
										29	224	38	16.9643
										30	275	40	14.5455
										31	281	41	14.5907
										32	365	51	13.9726
										33	268	27	10.0746
										34	282	51	18.0851
										35	284	50	17.6056
										36	254	34	13.3858
												Avg	13.8677

## Sheet: Supplementary Table 3
Percentage of PU1 in microglia enriched cultures
		%	Path				%	Path				%	Path
Epilepsy	1	91.9	Epilepsy		Brain tumours	1	98.8	GBM		Paediatric	1	74.4	Cortical dysplasia
	2	88.1	Epilepsy			2	76.2	Astrocytoma III			2	52.5	Polymicrogyria
	3	84.3	Epilepsy			3	81.5	GBM
	4	82.6	Epilepsy			4	84.4	Schwannoma			Mean	63.45
	5	86.5	Epilepsy			5	83.3	GBM			SD	15.4856
						6	94.8	GBM
	Mean	86.68				7	85.7	GBM
	SD	3.59194
						Mean	86.3857
						SD	7.81525

## Sheet: Enriched Micro Raw Data
% PU1 positive cells	EPILEPSY						TUMOUR								PAEDIATRIC Cortex
Samples	E205	E206	E210	E220	E221		T66	T67	T68	T178	T180	T69	SS43 - Tumour		SS56	SS59
1	93.7086	90.8199	83.1776	96.0159	87.1111		98.9637	40.8451	88.3929	84.4011	91.0217	86.6412	92.8571		70.4028	85.2772
2	93.5484	90.1835	85.9504	97.3822	90.4494		98.6979	62.069	77.3913	86.8914	91.3043	94.9309	73.0769		72.0183	88.7828
3	93.2432	88.5625	85.968	94.5783	82.2034		99.5662	41.0526	82.1429	86.9565	87.6404	93.9394	82.7586		73.1959	85.8124
4	93.0556	87.3794	78.0129	95.0704	87.9747		99.1351	38.2716	80	92.6966	82.8283	98.7879	87.8788		62.6667	87.037
5	93.9914	86.5842	87.0551	96.4602	85.9155		98.4946	48.2759	76.1194	87.9397	81.7439	97.3958	86.4865		72.0854	86.7537
6	91.2351	84.3832	88.4598	99.0476	86.7299		99.2099	51.8987	72.6619	86.6906	86.9403	96.4789	85.1852		74.7253	86.1789
7	97.4057	91.1184	84.0218	95.3757	90.4412		98.8506	41.4414	71.5789	88	73.1034	92.5	91.4894		72.5877	85.1415
8	92.0635	87.1402	83.9531	96.5035	86.8932		99.4279	47.2727	80.1527	90.6593	59.6639	99.2958	86.7347		81.0811	90.7186
9	85.7143	86.5515	82.0256	78.2805	92.511		98.9395	40	85.3261	83.5526	83.9572	97.0297	85.7143		72.7106	37.5899
10	94.1718			72.9958	85.8268		98.9044	75.3086	82.9897	83.1418	87.4618	85.1852	81.8182		73.0769	42.9644
11	92.7374			73.913	88.3978		97.9192	64	86.6242	81.8966	80.163	90.411	89.5833		76.5743	39.6861
12	95.3488			82.9412	91.9192		99.5575	72	84.1772	72.2022	82.1883	79.0598	84		83.1721	38.5301
13	93.1343			80.5	90.3614		98.2126	74.8032	86.1446	93.8931	86.1111	93.007	75		74.0995	41.5709
14	88.3817			81.3953	92.9889		98.3471	60.2837	81.2183	86.6071	83.871	97.6562	77.0833		74.5928	48.2955
15	91.8605			81.4634	88.4298		99.0249	78.2609	85.5172	91.6256	75.9459	98.7421	80		69.4323	41.2234
16	89.7611			80.8642	93.2642		99.556	62.5	80	91.6667	82.7586	92.8571	87.8049		78.2135	42.1466
17	90			84.9162	94.0367		98.783	68.4685	74.6154	92.2535	80	98.7261	70.9677		73.0706	47.6008
18	90.7801			87.7119	90.3101		99.1471	77.0992	82.1705	79.5987	78.9137	93.007	61.1111		74.9221	46.2451
19	91.2536			82.3529	90.1163		97.0326	99.3976	76.4706	85.446	75.8278	83.27	93.4783		81.3158	50.9868
20	93.1034			90.9774	83.5821		97.6431	100	81.7308	81.8182	74.0876	92.3469	90.1408		75	47.2
21	89.2655			86.911	84.3478		99.4609	97.9452	88.6792	86.6337	83.9286	93.6709	87.6923		64.5367	54.1284
22	91.8495			91.3636	80.0847		97.9328	99.3103	80.6202	85.7143	70.2857	96.4646	80		72.326	46.8847
23	86.3813			90.6667	89.1304		98.3607	92.623	87.6923	86.2903	88.1356	100	94.9153		76.5138	49.0196
24	89.2183			93.865	79.096		97.9021	98.1132	74	82.0611	76.2887	94.9153	91.3462		73.0382	55.0868
25	98.1595			74.3363	87.3984		99.3808	100	77.4194	85.1562	91.5309	95.8084	90.9091		70.8411	41.2731
26	95.8333			68.6275	84.1629		98.6971	100	86.5248	79.1444	88.4409	98.1818	73.913		75.0988	32.0298
27	87.013			85.8824	76.4706		100	98.3051	83.3333	80.2198	88.7906	92.9078	94.4444		62.3711	37.7834
28	93.1818			73.5849	82.0988		98.6595	87.6191	76.3636	82.6389	89.0323	92.674	86.9565		68.2975	35.7377
29	94.6997			72.8395	84.7328		98.4568	86.4407	81.383	84.2365	85.3731	98.0843	94.1176		67.5624	37.6936
30	92.1502			81.0185	79.5556		99.1453	86.8421	85.7143	86.3248	88.4507	98.8024	86.9565		71.1359	33.0275
31	85.8461			77.5862	82.3204		98.6559	93.4066	87.037	91.4141	89.1374	100	92.7928		74.1127	41.3559
32	92.8571			73.7968	75.8824		98.1723	93.5484	82.5641	84.0183	85.0932	99.095	91.5254		69.5745	41.196
33	91.6409			71.2121	87.9227		99.6667	91.3043		87.2222	85.4545	100	100		81.2165	49.8896
34	93.1507			70.6977	85.6354		98.9474	85.4167		83.9161	76.3066	97.7011	82.7586		79.3738	49.6255
35	93.7956			83.1933	84.7682		99.3266	95		85.906	89.2857	97.2477	91.3978		82.2072	44.7802
36	87.5			77.5862	87.0588		97.9651	94.3396		53.2967	75.8929	98.7805	86.8421		71.6667	40.5685
37				55.5556	90.2655					70.8333	89.644	88.7719	82.5243		73.7143	46.7412
38				71.5596	88						88.8489	94.8498	81.25		82.3529	45.0346
39				89.2308	85.5422						88.9937	96.6245	89.1667		81.9121	49.0617
40				64.1667	87.8151						88.3978	96.3415	85.7143		91.2351	47.314
avg	91.8623	88.0803	84.2916	82.5607	86.5438		98.7818	76.2073	81.4611	84.4044	83.3211	94.8047	85.7098		74.3508	52.4493
SD	3.02503	2.26413	3.09352	10.3678	4.42034		0.65274	21.3464	4.77207	7.2282	6.83994	4.78855	7.61724		5.81088	18.2259
